# Supplementary material for: Physiological and transcriptomic analyses of the effects of SlBRI1 expression levels on drought tolerance in tomato seedlings
Source: Research Square preprint supplement (doi:10.21203/rs.3.rs-200334/v1), 2021-02-17
Supplement: Supplementary file 1 [file 5187dadfdbfb0fa69c64ae5e.xls]

## Sheet: 注释详情
	Supplementary Table S4. Changes in the expression of oxidoreductase activity genes in different samples
							MM vs MMDS		MM vs abs		MM vs SlBRI1OE		MMDS vs absDS
	Gene ID	Description					log2(FC)	P value	log2(FC)	P value	log2(FC)	P value	log2(FC)	P value
	Solyc01g006290.4	Peroxidase (AHRD V3.					5.36	2.74108e-06	8.2567	2.2503e-09	0.8	0.535922	-1.198	0.188969
	Solyc12g096530.1	Peroxidase (AHRD V3.3 *** K4DHC6_SOLLC)					0.56	0.347221	3.36	2.1431e-05	1.62	0.000618376	1.28	0.232662
	Solyc02g083490.3	Peroxidase (AHRD V3.3 *** K4BAL7_SOLLC)					4.48	0.119696	5.64	0.0070942	1.78	0.658764	0.1679	0.898068
	Solyc02g079500.4	Peroxidase (AHRD V3.3 *** M1C184_SOLTU)					0.751	0.132954	2.058	3.25411e-07	0.098	0.732932	1.317	0.01282
	Solyc03g044100.4	Peroxidase (AHRD V3.3 *** K4BG30_SOLLC)					0.27	0.688724	2.53	1.3166e-09	0.505	0.350874	1.03	0.0863391
	Solyc09g007270.3	Ascorbate peroxidase (AHRD V3.3 *** Q42941_TOBAC)					4.7	6.14582e-22	1.75	0.000370551	0.31	0.544575	-1.1	0.0448904
	Solyc02g083630.3	Ascorbate peroxidase (AHRD V3.3 *** Q39780_GOSHI)					1.54	0.0452731	3.111	5.20693e-05	0.85	0.33591	0.988	0.304495
	Solyc04g054690.3	ascorbate oxidase					0.048	0.95296	3.159	4.00884e-08	-0.69	0.38482	5.507	1.04819e-13
	Solyc08g075540.5.1	alternative oxidase					2.36	0.000183235	2.546	1.89353e-09	0.189	0.590972	1.021	0.120746
	Solyc07g052230.3	L-ascorbate oxidase-like protein (AHRD V3.3 *** A0A1U8HJB7_CAPAN)					3.847	1.6304e-10	4.327	3.74471e-10	0.922	0.214724	1.835	0.00114643
	Solyc08g074630.2	Polyphenol oxidase (AHRD V3.3 *** O49912_TOBAC)					3.46	0.0196698	4.179	0.00421637	1.198	0.568582	4.918	1
