# Supplementary material for: Physiological and transcriptomic analyses of the effects of SlBRI1 expression levels on drought tolerance in tomato seedlings
Source: Research Square preprint supplement (doi:10.21203/rs.3.rs-200334/v1), 2021-02-17
Supplement: Supplementary file 2 [file c4a52e2130998103a6565f2e.xls]

## Sheet: sheet1
Supplementary Table S5. Changes in the expression of polyamine biosynthetic process genes in different samples
		MM vs MMDS		MM vs abs		MM vs SlBRI1OE		MMDS vs absDS
Gene ID	Description	log2(FC)	P value	log2(FC)	P value	log2(FC)	P value	log2(FC)	P value
Solyc05g010425.1	S-adenosylmethionine decarboxylase (AHRD V3.3 *-* Q6KC47_PRUPE)	1.94	5.35213e-07	1.85	2.31514e-07	0.039	0.914036	1.93	1.50482e-05
Solyc05r024360.1	-	2	8.15406e-08	2.017	1.75904e-08	0.089	0.793136	2.1088	1.52867e-06
Solyc07g043590.3	Polyamine oxidase 3 (AHRD V3.3 *** A0A2G3BYY2_CAPCH)	2.33	1.67598e-16	1.466	1.05228e-08	0.238	0.345238	0.0566	0.852008
Solyc10g054440.3	arginine decarboxylase 1	2.52	8.3057e-06	1.859	7.98259e-18	-0.177	0.428333	1.383	0.0404103
Solyc01g110430.3	Unknown protein	3.01	2.27643e-36	3.13	7.96684e-57	0.48	0.00512487	1.678	0.00129413
Solyc05g010420.2	S-adenosylmethionine decarboxylase	2.14	1.90675e-08	2.27	5.32366e-11	-0.2	0.477119	2.206	9.15096e-06
Solyc02g089610.2	S-adenosylmethionine decarboxylase 2	3.05	1.23394e-11	2.266	4.3673e-16	0.36	0.389923	0.8148	0.255261
Solyc01g110440.5.1	arginine decarboxylase	3.115	3.05477e-50	3.06	5.83767e-59	0.65	9.96745e-05	1.528	0.00518095
Solyc02g150147.1	S-adenosylmethionine decarboxylase (AHRD V3.3 *-* Q6KC47_PRUPE)	3.37	2.95627e-08	2.34	2.069e-09	0.83	0.0731501	0.489	0.51141
Solyc03g007240.3	spermine synthase,Pfam:PF01564	1.488	0.000479592	2.017	2.34642e-08	0.217	0.462332	2.259	6.41535e-05
Solyc02g081390.3	Lysine-specific histone demethylase 1 (AHRD V3.3 *** B6SW44_MAIZE)	0.542	0.20378	2.95	2.86002e-42	0.318	0.275491	1.481	0.000659596
Solyc04g026030.3	Spermidine synthase (AHRD V3.3 *** A0A088DA02_CAPAN),Pfam:PF01564	0.414	0.208676	1.225	6.42043e-08	0.058	0.81269	0.709	0.0164349
Solyc03g098300.1	Ornithine decarboxylase (AHRD V3.3 *** A0A1U8G8Q1_CAPAN)	4.807	0.107172	8.84	0.00123672	1.78	0.658764	2.819	0.106031
Solyc04g082030.1	ornithine decarboxylase	1.176	0.019286	2.344	2.08966e-07	-0.336	0.361556	1.317	0.103242
